# Supplementary material for: Tailoring atomic distribution in micron-sized and spherical Li-rich layered oxides as cathode materials for advanced lithium-ion batteries
Source: Royal Society of Chemistry journal article supplement (doi:10.1039/c6ta01878e), 2016-01-01
Supplement: c6ta01878e1.pdf [file c6ta01878e1.pdf]

## Supporting Information

### Tailoring Atomic Distribution in Micron-sized and Spherical Li-rich Layered Oxides as Cathode Materials for Advanced Lithium-ion Batteries

Peiyu Hou, Guoran Li, Xueping Gao\*

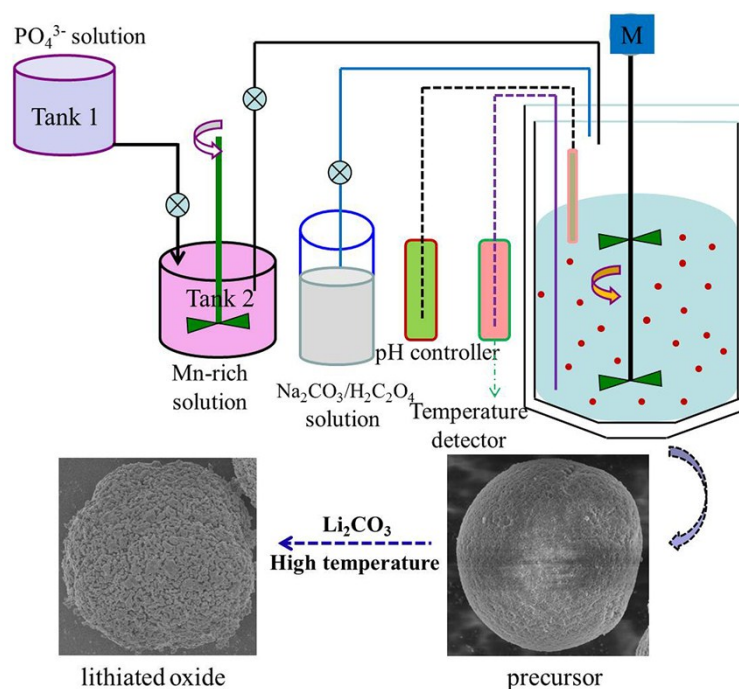

Fig. S1 Schematic diagram of the CSTR in preparing the CG- $\text{PO}_4^{3-}$  doped carbonate precursors and lithiated oxides; Tank 2: Ni/Co/Mn=1/1/4, Tank 1:  $\text{PO}_4^{3-}$  solution.

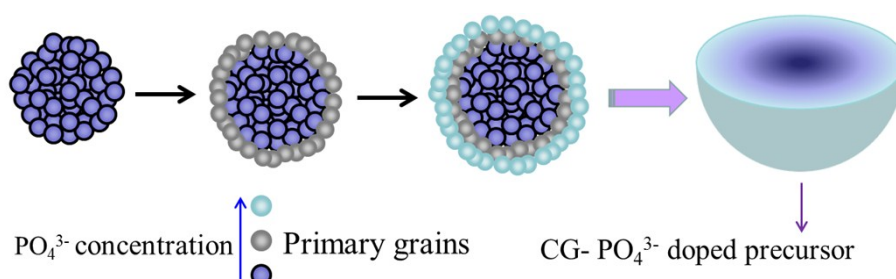

Fig. S2 The detailed formation mechanism of concentration-gradient  $\text{PO}_4^{3-}$  doped precursors during co-precipitation process in CSTR.

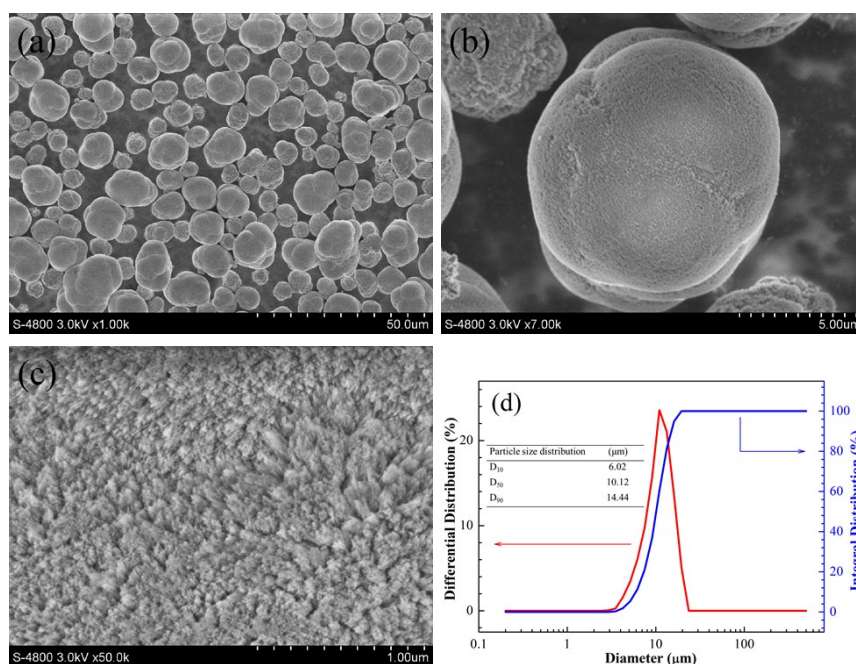

Fig. S3 SEM images (a-c) and particle size distribution (d) of the normal carbonate precursors.

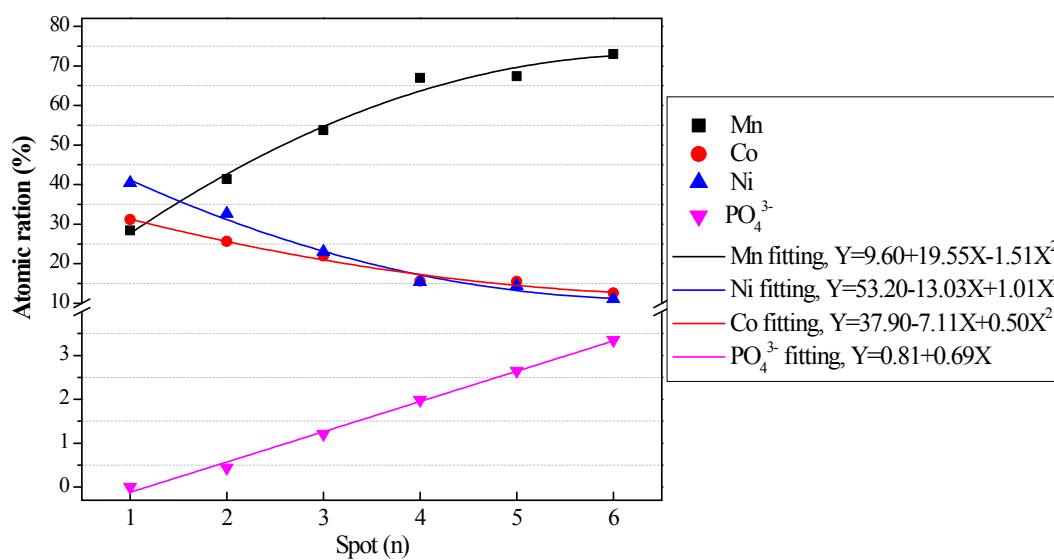

Fig. S4 The spot scanning EDS results on the cross-section of a single CG-PO<sub>4</sub><sup>3-</sup> doped precursor particle and the fitting results.

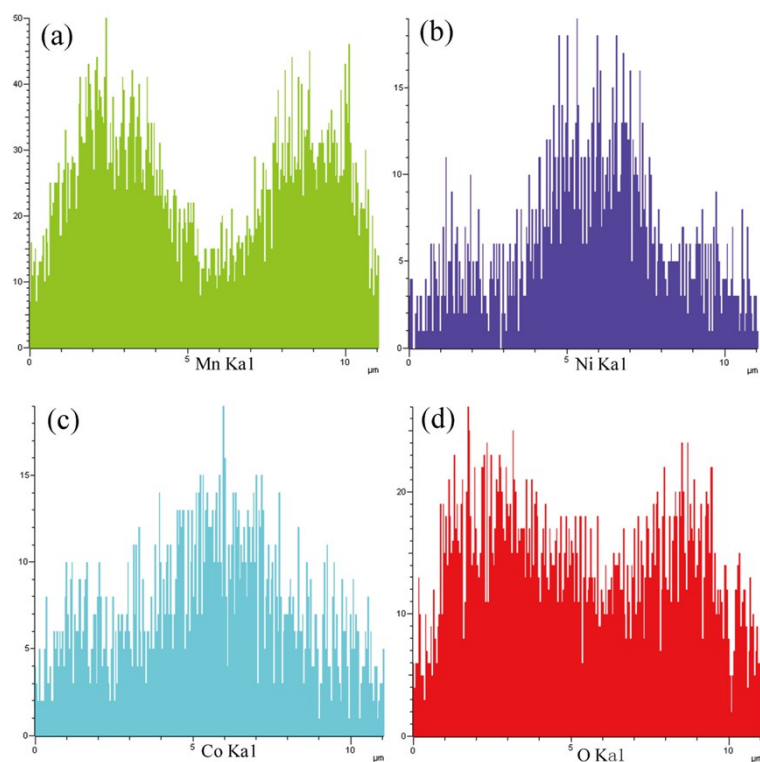

Fig. S5 Detailed linear scanning EDS results of Mn (a), Ni (b), Co (c) and O (d) compositional changes on the cross-section of a single CG-PO<sub>4</sub><sup>3-</sup> doped precursor particle.

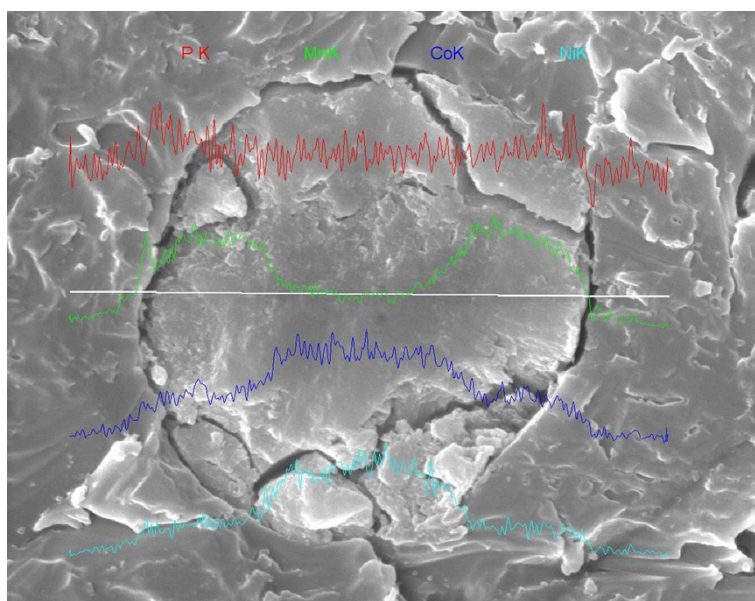

Fig. S6 Linear scanning EDS results of the compositional changes on the cross-section of a single CG-PO<sub>4</sub><sup>3-</sup> doped carbonate precursor particle.

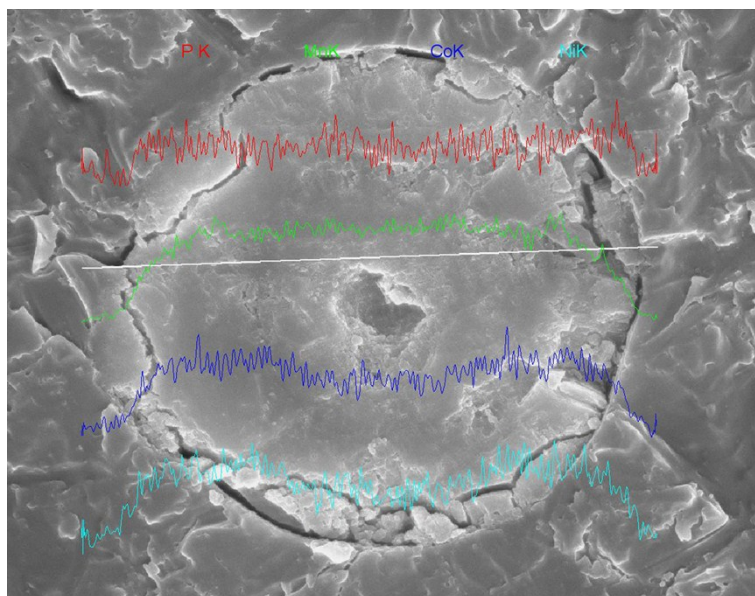

Fig. S7 Linear scanning EDS results of the compositional changes on the cross-section of a single normal carbonate precursor particle.

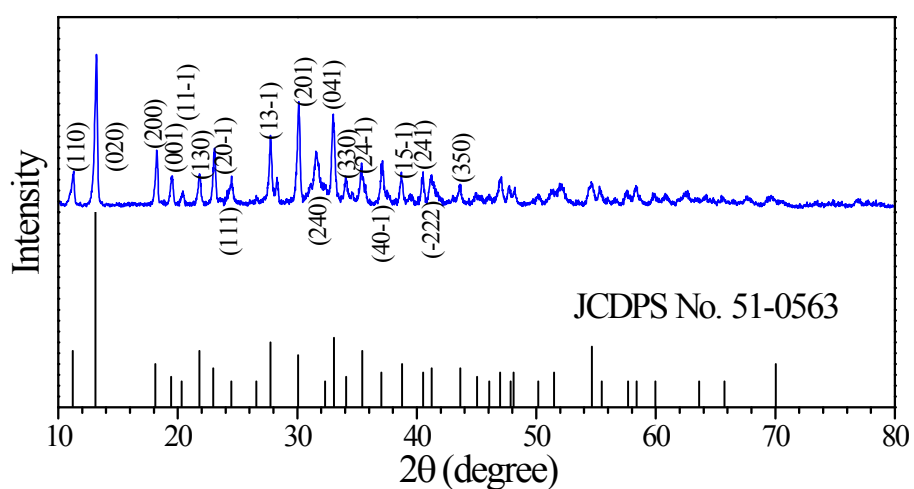

Fig. S8 XRD results of the new deposit achieved from the normal precursors  $(\text{Ni}_{1/6}\text{Co}_{1/6}\text{Mn}_{4/6})\text{CO}_3$  in 0.1 M  $\text{KH}_2\text{PO}_4$  solution after 36 h.

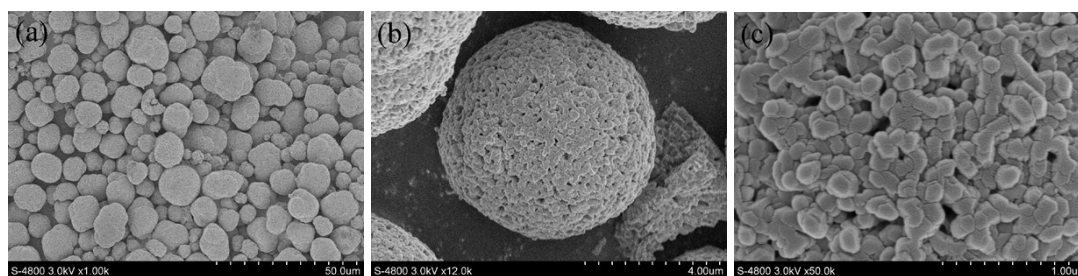

Fig. S9 SEM images of the normal Li-rich layered oxides.

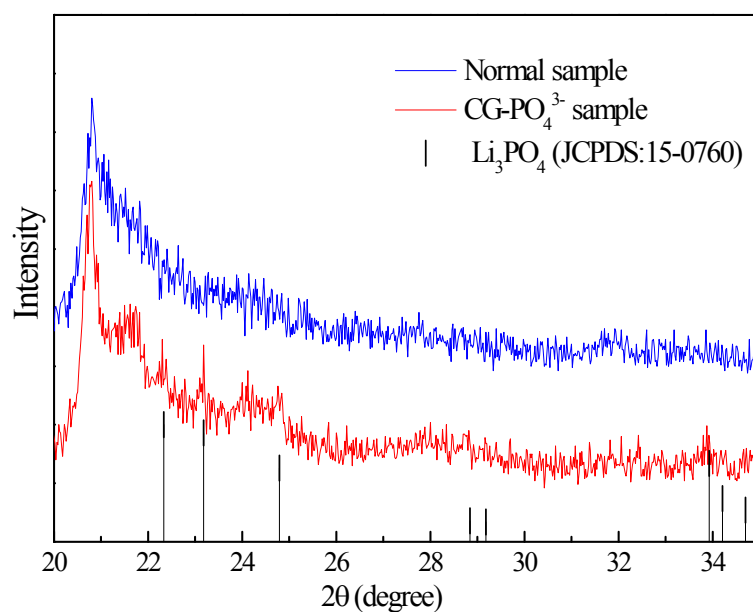

Fig. S10 Part XRD results of the normal and CG-PO<sub>4</sub><sup>3-</sup> doped Li-rich layered oxides.

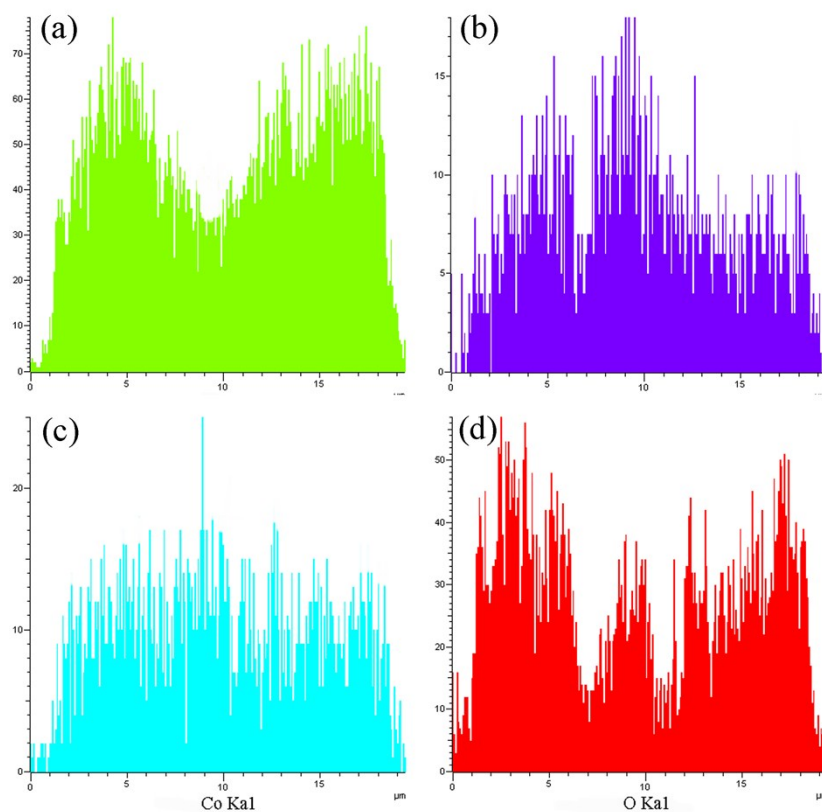

Fig. S11 Detailed linear scanning EDS results of Mn (a), Ni (b), Co (c) and O (d) compositional changes on the cross-section of a single CG-PO<sub>4</sub><sup>3-</sup> doped Li-rich oxide particle.



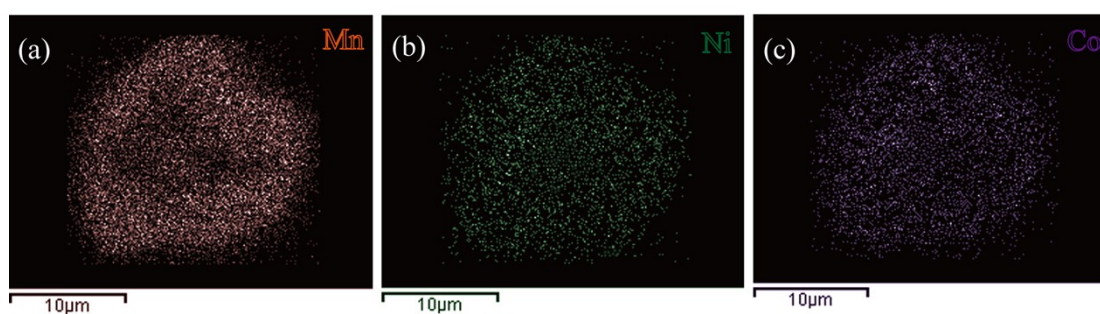

Fig. S12 The map scanning EDS results on the cross-section of a single CG-PO<sub>4</sub><sup>3-</sup> doped Li-rich oxide particle.

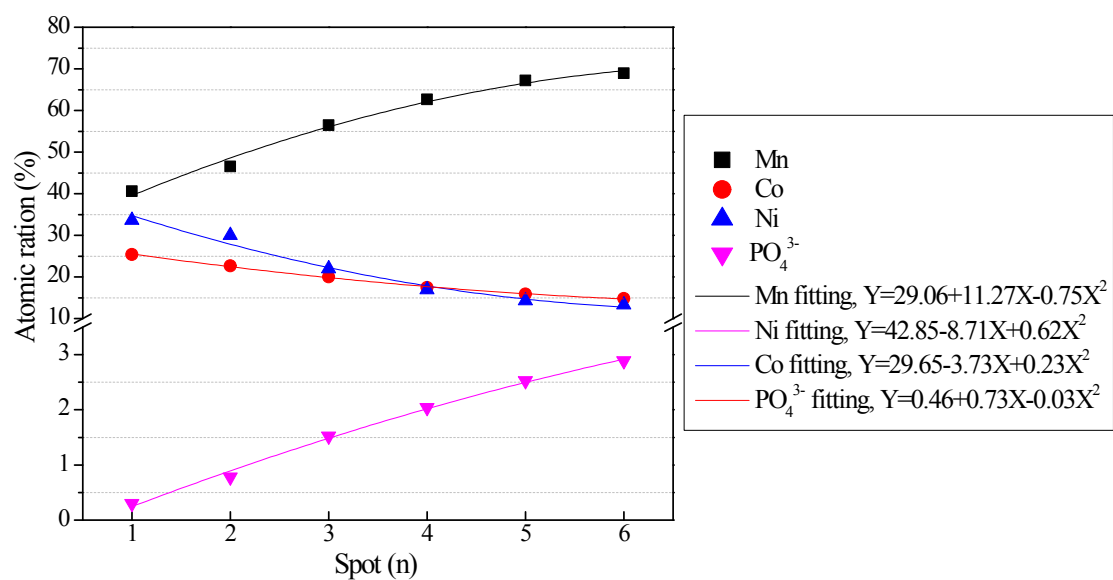

Fig. S13 The spot scanning EDS results on the cross-section of a single CG-PO<sub>4</sub><sup>3-</sup> doped Li-rich oxide particle and the fitting results.

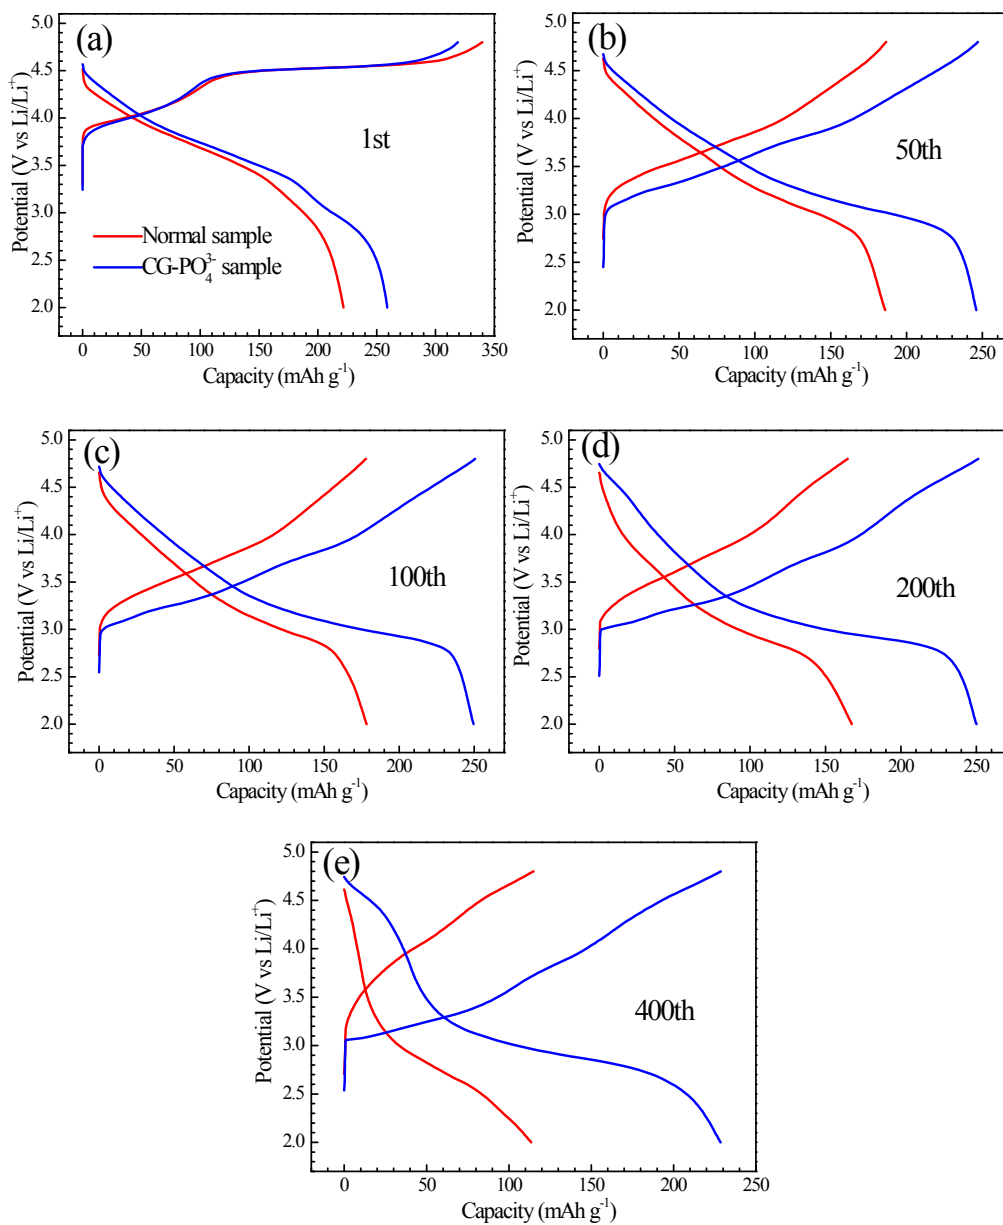

Fig. S14 The 1st, 50th, 100th, 200th and 400th charge-discharge curves of the normal and CG-PO<sub>4</sub><sup>3-</sup> doped Li-rich layered oxides at current density of 100 mA g<sup>-1</sup> and 25 °C.
